# Supplementary material
Source: PubMed Central journal article supplement (PMC3029736)
Supplement: 1010833108_pnas.201010833SI.pdf [file 1010833108_pnas.201010833SI.pdf]

# Supporting Information

Habtezion et al. 10.1073/pnas.1010833108

## SI Materials and Methods

**Microarray Analysis.** Total RNA was extracted from isolated colonocytes using the RNeasy midi kit (Qiagen). The RNA was analyzed using an Applied Biosystems platform as recommended by the manufacturer. Two RNA samples were prepared for each of the four sample types ( $K8^{+/+}$  untreated,  $K8^{+/+}$  antibiotic-treated,  $K8^{-/-}$  untreated, and  $K8^{-/-}$  antibiotic-treated) for a total of eight samples. Each sample was assayed on duplicate microarrays, and results were quantile normalized per replicate array pair. Following normalization, data were filtered to remove “undetected” microarray probes (detection was defined as a signal-to-noise

ratio  $>3$  on both arrays of a replicate pair). The correlation coefficient  $R$  of assay signal for each replicate array pair then was calculated to verify high correlation between replicate arrays. Differentially expressed genes were identified using a  $t$  test and filtering for  $P < 0.01$ . Differentially expressed genes were filtered further by applying a false-discovery rate procedure before analysis using the PathArt pathway database from Jubilant Biosys. Normalization, correlation analysis, and  $t$  tests were performed using MATLAB (Mathworks). Additional data plotting and visualizations were performed using Spotfire DecisionSite (TIBCO) and GeneSpring (Agilent Technologies).

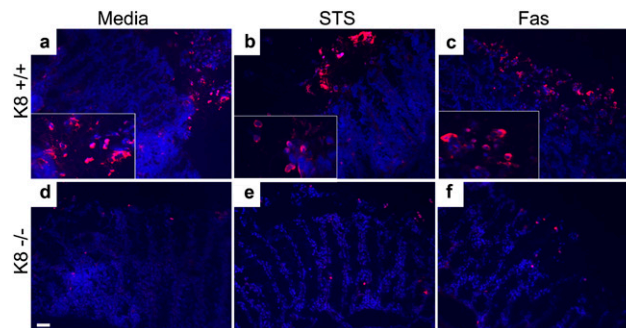

**Fig. S1.** Resistance of keratin 8-null ( $K8^{-/-}$ ) colon to apoptosis. Colon organ segments from  $K8^{+/+}$  and  $K8^{-/-}$  mice were cultured in the presence or absence of staurosporine (STS) or Fas for 1 h. The organ cultures then were processed for antibody staining of apoptotic cells (red) using the ApopTag Red In Situ Apoptosis Detection Kit and nuclei (blue). Note the resistance to apoptosis in  $K8^{-/-}$  colons (D–F). Insets show magnified views. (Scale bar: 50  $\mu\text{m}$ .)

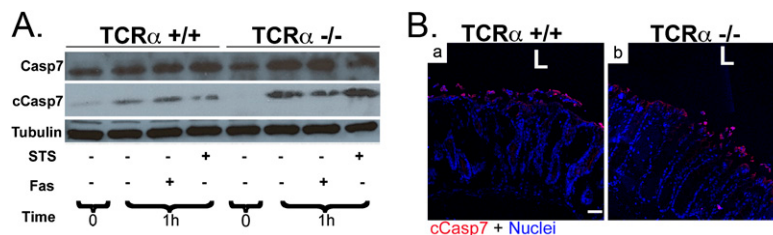

**Fig. S2.** Colon organ cultures from T-cell receptor  $\alpha$ -null ( $TCR\alpha^{-/-}$ ) mice are more susceptible to apoptosis than are parallel cultures from  $TCR\alpha^{+/+}$  mice. Colon organ cultures from  $TCR\alpha$  WT or  $TCR\alpha^{-/-}$  mice were maintained in the presence or absence of staurosporine (STS) or Fas for 1 h. The organ cultures then were processed for immunoblotting (A) or immunohistochemistry (B) using anti-cleaved caspase-7 (cCasp7) (red) and nuclei (blue). Note the lack of resistance to apoptosis in  $TCR\alpha^{-/-}$  colons (A and image *b* in B). (Scale bar: 50  $\mu\text{m}$ .) Casp, caspase 7; L, lumen.

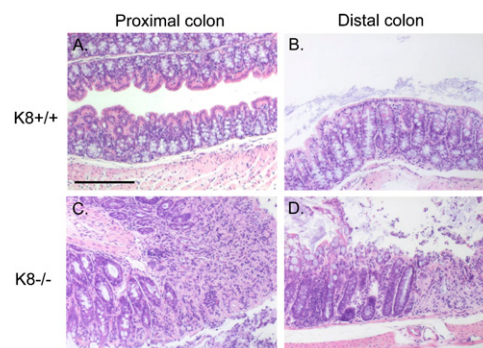

**Fig. S3.** Inflammation in proximal and distal colon of  $K8^{-/-}$  mice. Proximal (A and C) and distal (B and D) colons from  $K8^{+/+}$  (A and B) and  $K8^{-/-}$  (C and D) mice were isolated, fixed, and processed for paraffin embedding. Paraffin sections were stained with hematoxylin and eosin, and images were captured on a Zeiss Axiovert 200M microscope. Inflammation is more pronounced in the proximal colon (C) than in the distal colon (D) of  $K8^{-/-}$  mice. The panels are representative of histologic analyses of colons isolated from at least eight  $K8^{+/+}$  and eight  $K8^{-/-}$  animals. (Scale bar: 200  $\mu\text{m}$ .)

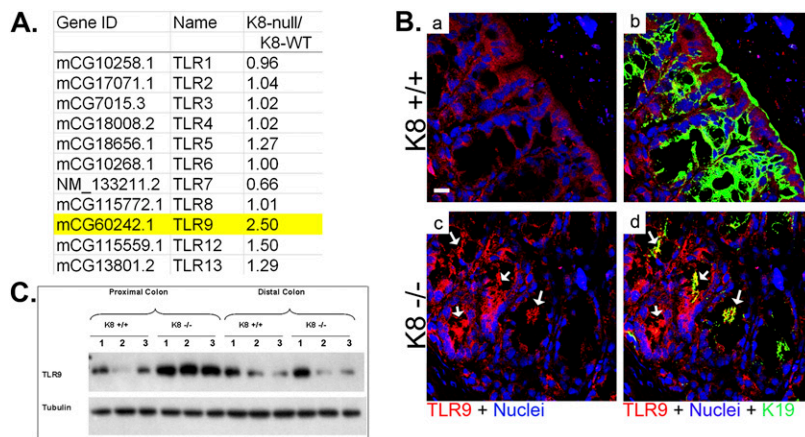

**Fig. S4.** Altered TLR9 expression in K8<sup>-/-</sup> colon. (A) Total RNA from freshly isolated K8<sup>-/-</sup> and K8<sup>+/+</sup> colonocytes was used for microarray analysis. The table depicts Toll-like receptor (TLR) fold change between K8<sup>-/-</sup> and K8<sup>+/+</sup> colonocytes as determined by microarray analysis. (B) Frozen colon sections from 3-mo-old K8<sup>+/+</sup> (a and b) and K8<sup>-/-</sup> (c and d) mice were triple stained for TLR9 (red), K19 (green), and nuclei (blue). Merged images for the indicated triple staining are shown. Note increased colonocyte TLR9 by microarray analysis (A), immunohistochemistry (B), and immunoblotting (C) in K8<sup>-/-</sup> colons. Numbers in C identify individual mice. (Scale bar: 10  $\mu$ m.)

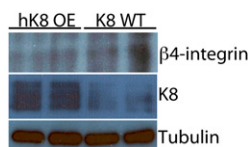

**Fig. S5.** Altered  $\beta$ 4-integrin expression in colons of K8-overexpressing mice. Colon lysates from mice overexpressing human K8 (hK8 OE) and K8 WT mice were blotted with antibodies to  $\beta$ 4-integrin, K8, and tubulin. Note lower expression of  $\beta$ 4-integrin in hK8OE colons than in K8 WT colons. Because of the strong immune reactivity of the K8 antibody (Troma I), we diluted the tissue homogenate significantly to demonstrate the overexpression of K8. Several K8 species are noted because of proteolytic degradation, which occasionally occurs.

**Table S1. The 20 genes most highly up-regulated in the K8<sup>-/-</sup> colon crypts**

| Gene ID     | Gene name                              | Relative up-regulation* |
|-------------|----------------------------------------|-------------------------|
| mCG8607.1   | Mast cell protease 2                   | 149.0                   |
| mCG8610     | Mast cell protease 1                   | 145.3                   |
| mCG133706   | Mast cell protease 9                   | 99.1                    |
| mCG5445.2   | Secretory leukocyte protease inhibitor | 84.2                    |
| mCG130832.1 | Mast cell protease 4                   | 58.7                    |
| mCG21886.2  | Carboxypeptidase A3, mast cell         | 27.8                    |
| mCG14532.1  | Phospholipase A2, group IIA            | 27.0                    |
| mCG17632.2  | Mast cell protease 7                   | 25.2                    |
| mCG65051.3  | T-cell-specific GTPase                 | 21.3                    |
| mCG6027.2   | Ia-associated invariant chain          | 16.4                    |
| mCG4516.2   | Granzyme A                             | 15.8                    |
| mCG14391.2  | Glial cells missing homolog 1          | 15.6                    |
| mCG17997.2  | Indoleamine-pyrrole 2,3 dioxygenase    | 15.5                    |
| mCG125443.1 | Regenerating islet-derived 3- $\gamma$ | 15.4                    |
| mCG7888.2   | Calbindin 3                            | 14.6                    |
| mCG130827   | Granzyme B                             | 14.0                    |
| mCG20526.2  | Keratin complex 1, acidic, gene 13     | 13.6                    |
| mCG8608.1   | Mast cell protease 5                   | 13.5                    |
| mCG52384.1  | Chemokine (C-C motif) ligand 7         | 13.2                    |
| mCG11880.2  | Malic enzyme                           | 11.7                    |

\*Genes up-regulated in K8<sup>-/-</sup> compared with K8<sup>+/+</sup> colonocytes.
